# Supplementary material
Source: PubMed Central journal article supplement (PMC6692205)

**Article name:** CT Radiomics Associations with Genotype and Stromal Content in Pancreatic Ductal Adenocarcinoma

**Journal name:** Abdominal Radiology

**Author names:** Blinded for review

**Affiliation and e-mail address of the corresponding author:**  
Blinded for review

**Online Resource 1.** Representative slices demonstrating segmentations superimposed on portal venous phase images from a 71 year-old female with pancreatic adenocarcinoma.

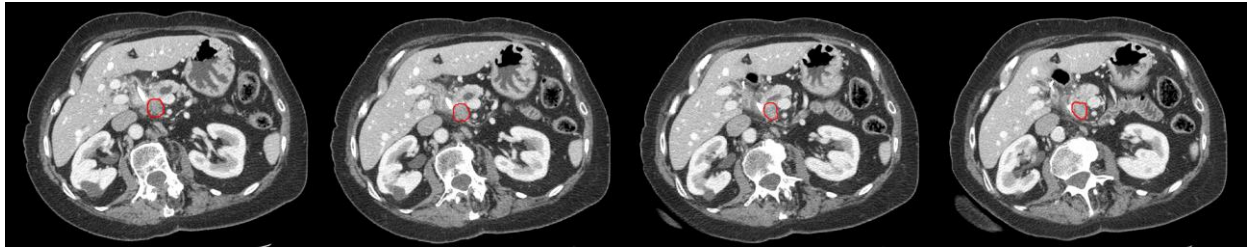

Supplement: NIHMS1532908-supplement-1.pdf [file NIHMS1532908-supplement-1.pdf]
